# Supplementary material for: A neuronal mechanism underlying decision-making deficits during hyperdopaminergic states
Source: PubMed Central journal article supplement (PMC5821846; doi:10.1038/s41467-018-03087-1), 2018-02-21
Supplement: 41467_2018_3087_MOESM3_ESM.pdf [file 41467_2018_3087_MOESM3_ESM.pdf]

## **Description of Additional Supplementary Files**

File Name: Supplementary Movie 1

Description: *In vivo* neuronal population activity from DA neurons in the VTA of a TH::Cre rat during reversal learning, measured using fiber photometry.
